# Supplementary material for: Malignant cell receptor-ligand subtypes guide the prediction of prognosis and personalized immunotherapy of liver cancer
Source: publisher site journal article supplement (doi:10.18632/aging.205453), 2024-01-18
Supplement: Supplementary file [file aging-v16i2-205453-supplementary-material-SD1.pdf]

**SUPPLEMENTARY FIGURE**

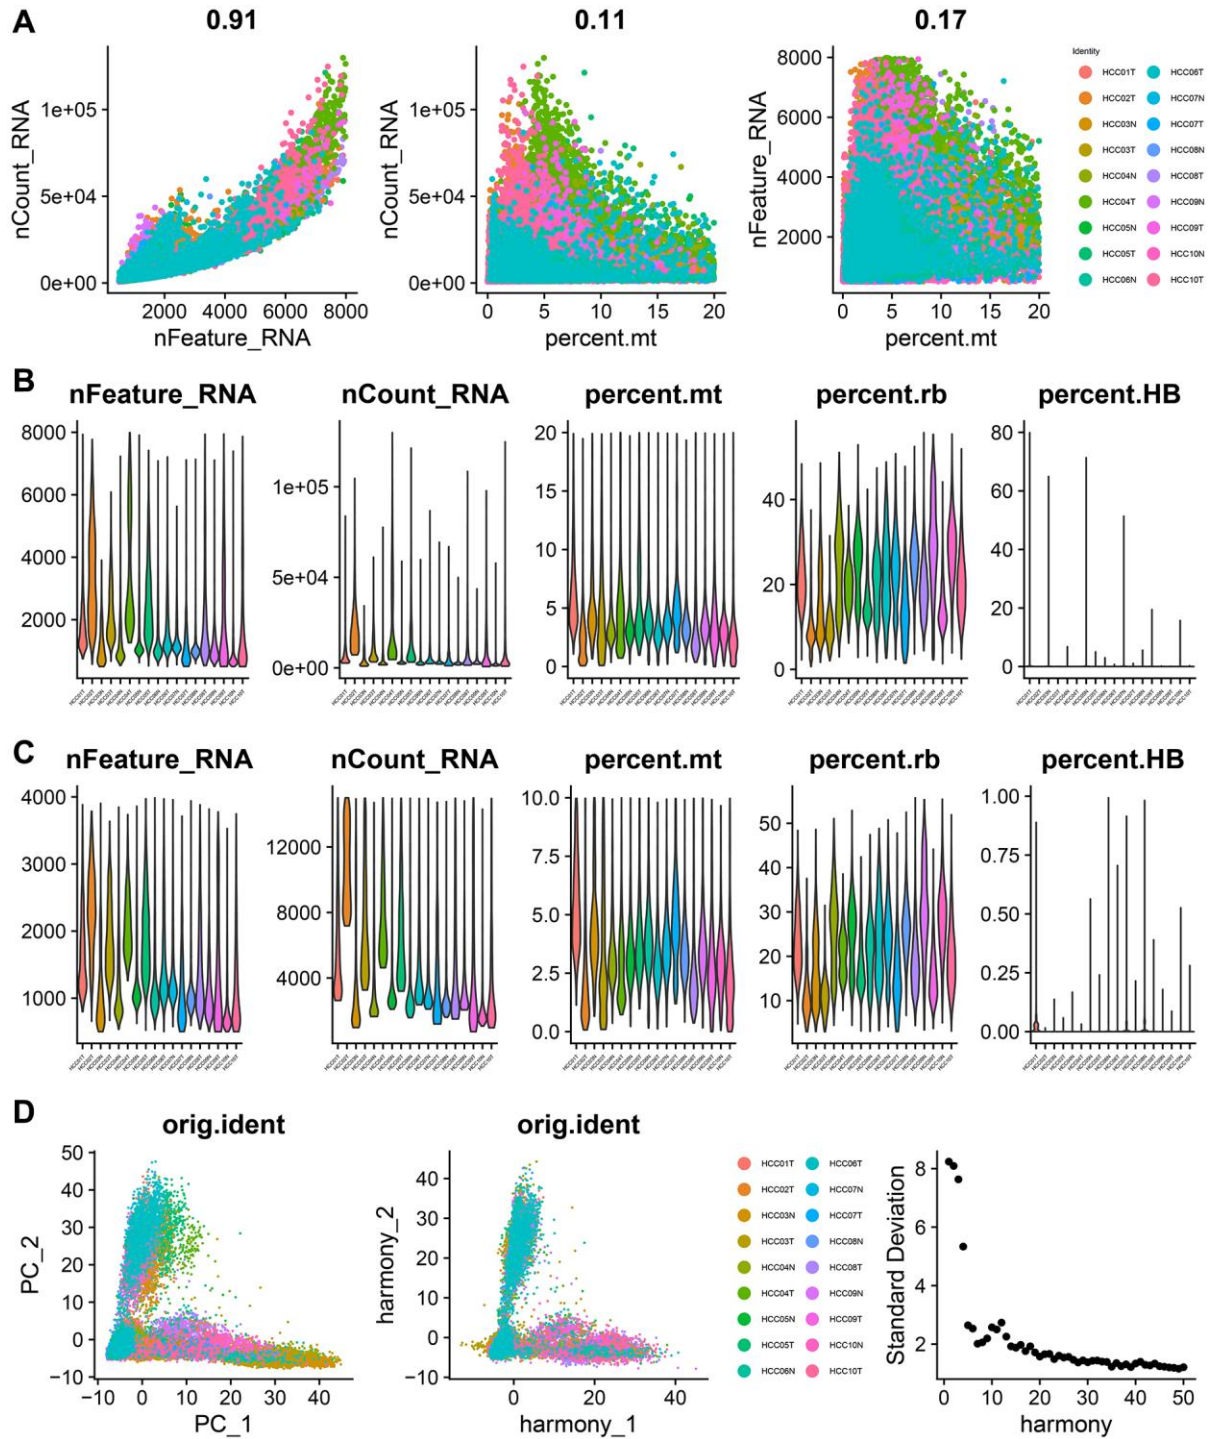

**Supplementary Figure 1.** (A) Relationship between mitochondrial gene and UMI/mRNA quantity, relationship between UMI and mRNA quantity. (B) Relationship between mRNA/UMI/mitochondrial content/rRNA content of each sample before filtration. (C) Relationship between mRNA/UMI/mitochondrial content/rRNA content of each sample after filtration. (D) Sample distribution map of PCA dimension reduction and anchor map of PCA.
